# Supplementary material for: Fecal Fusobacterium nucleatum for the diagnosis of colorectal tumor: A systematic review and meta‐analysis
Source: PubMed Central journal article supplement (PMC6382715; doi:10.1002/cam4.1850), 2019-01-12

Figure S2: Publication bias of included studies

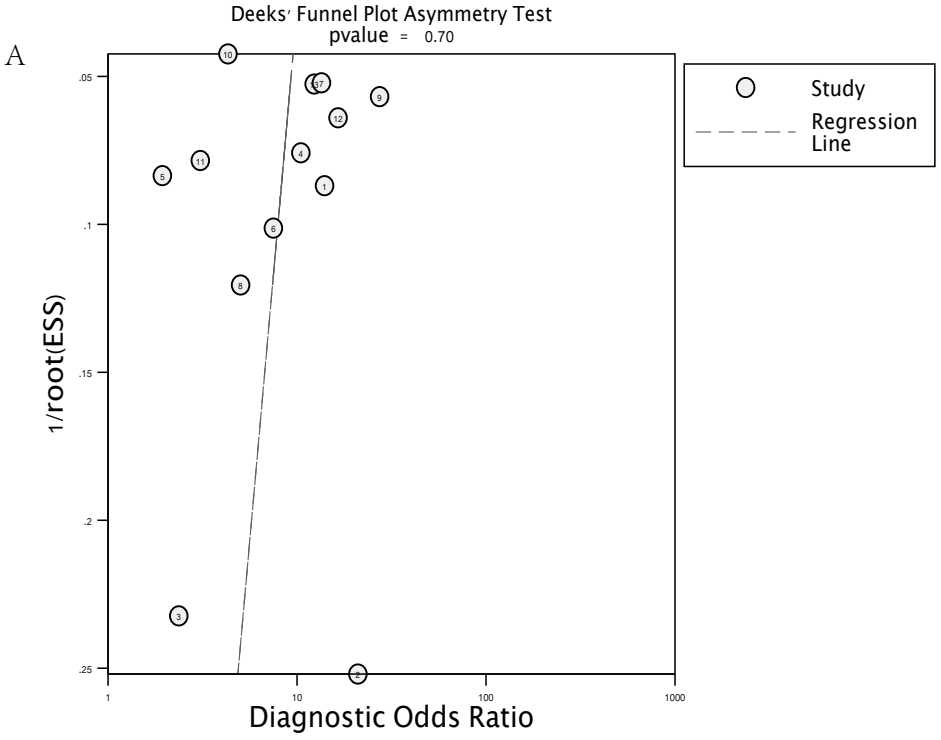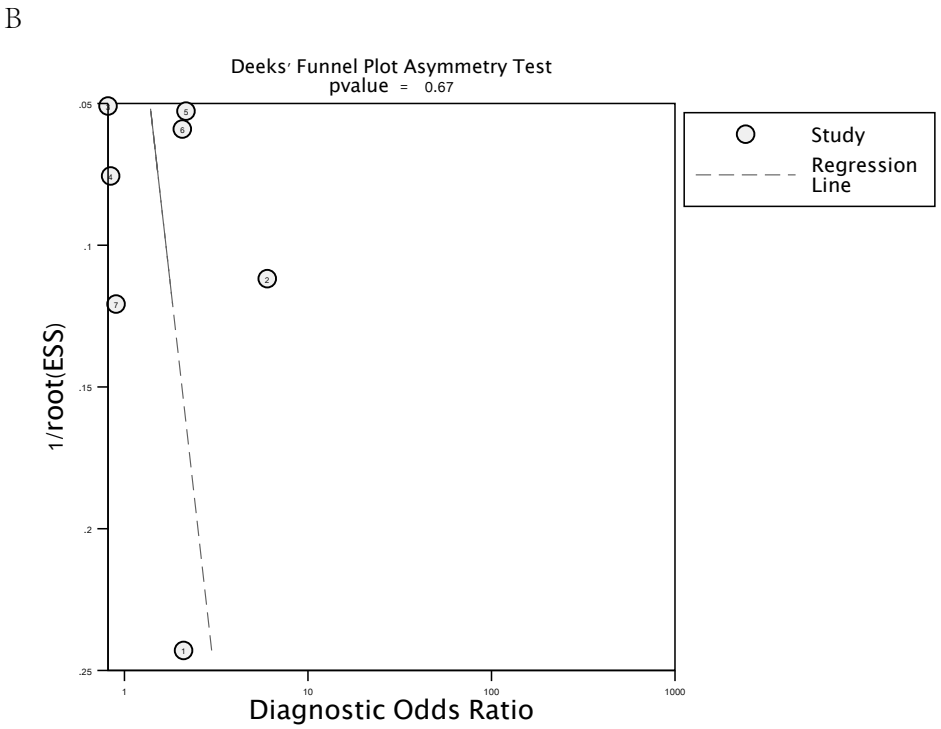

Supplement: CAM4-8-480-s002.pdf [file CAM4-8-480-s002.pdf]
